# Supplementary material for: Missing data imputation using classification and regression trees
Source: PeerJ journal article supplement (doi:10.7717/peerj-cs.2119), 2024-06-28
Supplement: 0_Figure__supple.pdf [file 0_Figure__supple.pdf]

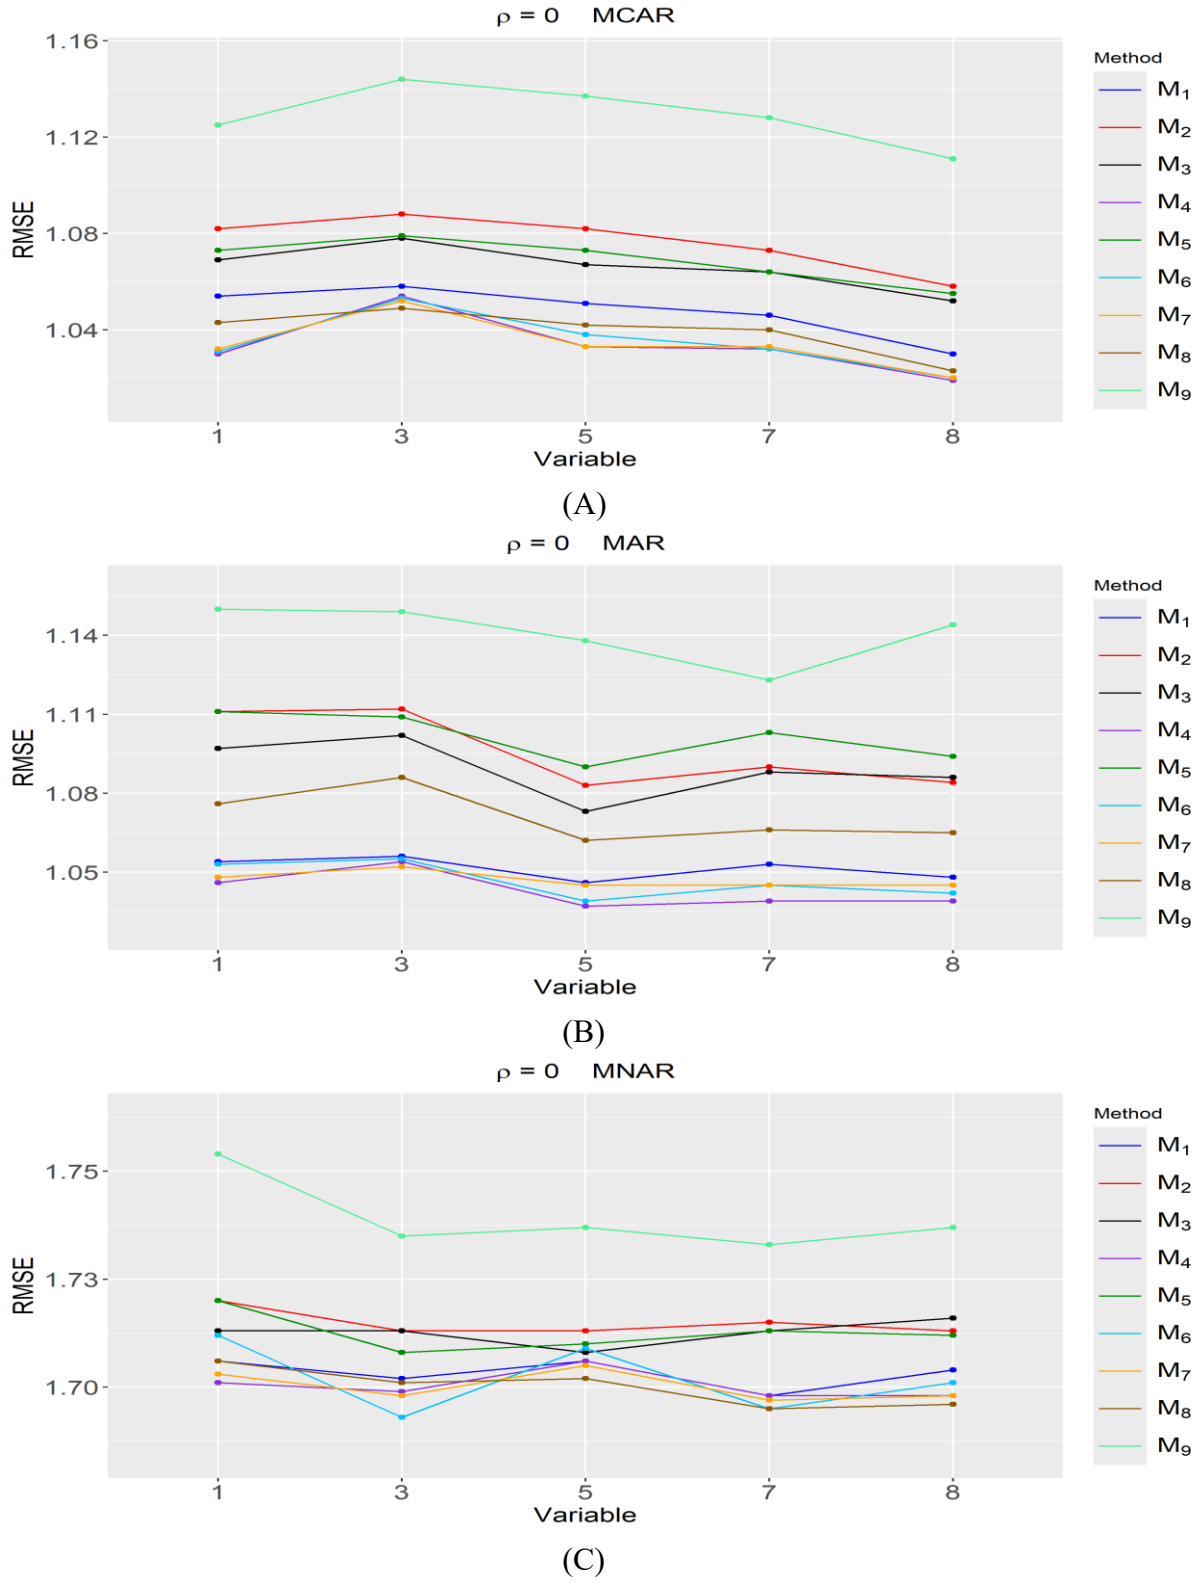

Figure S1: The imputation performances for quantitative variables 1, 3, 5, 7, and 8 under the condition  $\rho = 0$ , missing rate 20%,  $N = 500$ , and (A) MCAR, (B) MAR, (C) MNAR. The  $RMSE_p$  under Methods  $M_1$  to  $M_8$  are plotted respectively for each of the

variables. Imputation methods:  $M_1$ : *rpart* with surrogate variables;

$M_2$ : GI (RSS) + majority rule;  $M_3$ : GI (RSS) + RE algorithm;  $M_4$ : GI (RSS) + H-RE algorithm;  $M_5$ : CHI + majority rule;  $M_6$ : CHI + RE algorithm;  $M_7$ : CHI + H-RE algorithm;  $M_8$ : iterative imputation;  $M_9$ : *mice* with cart option.

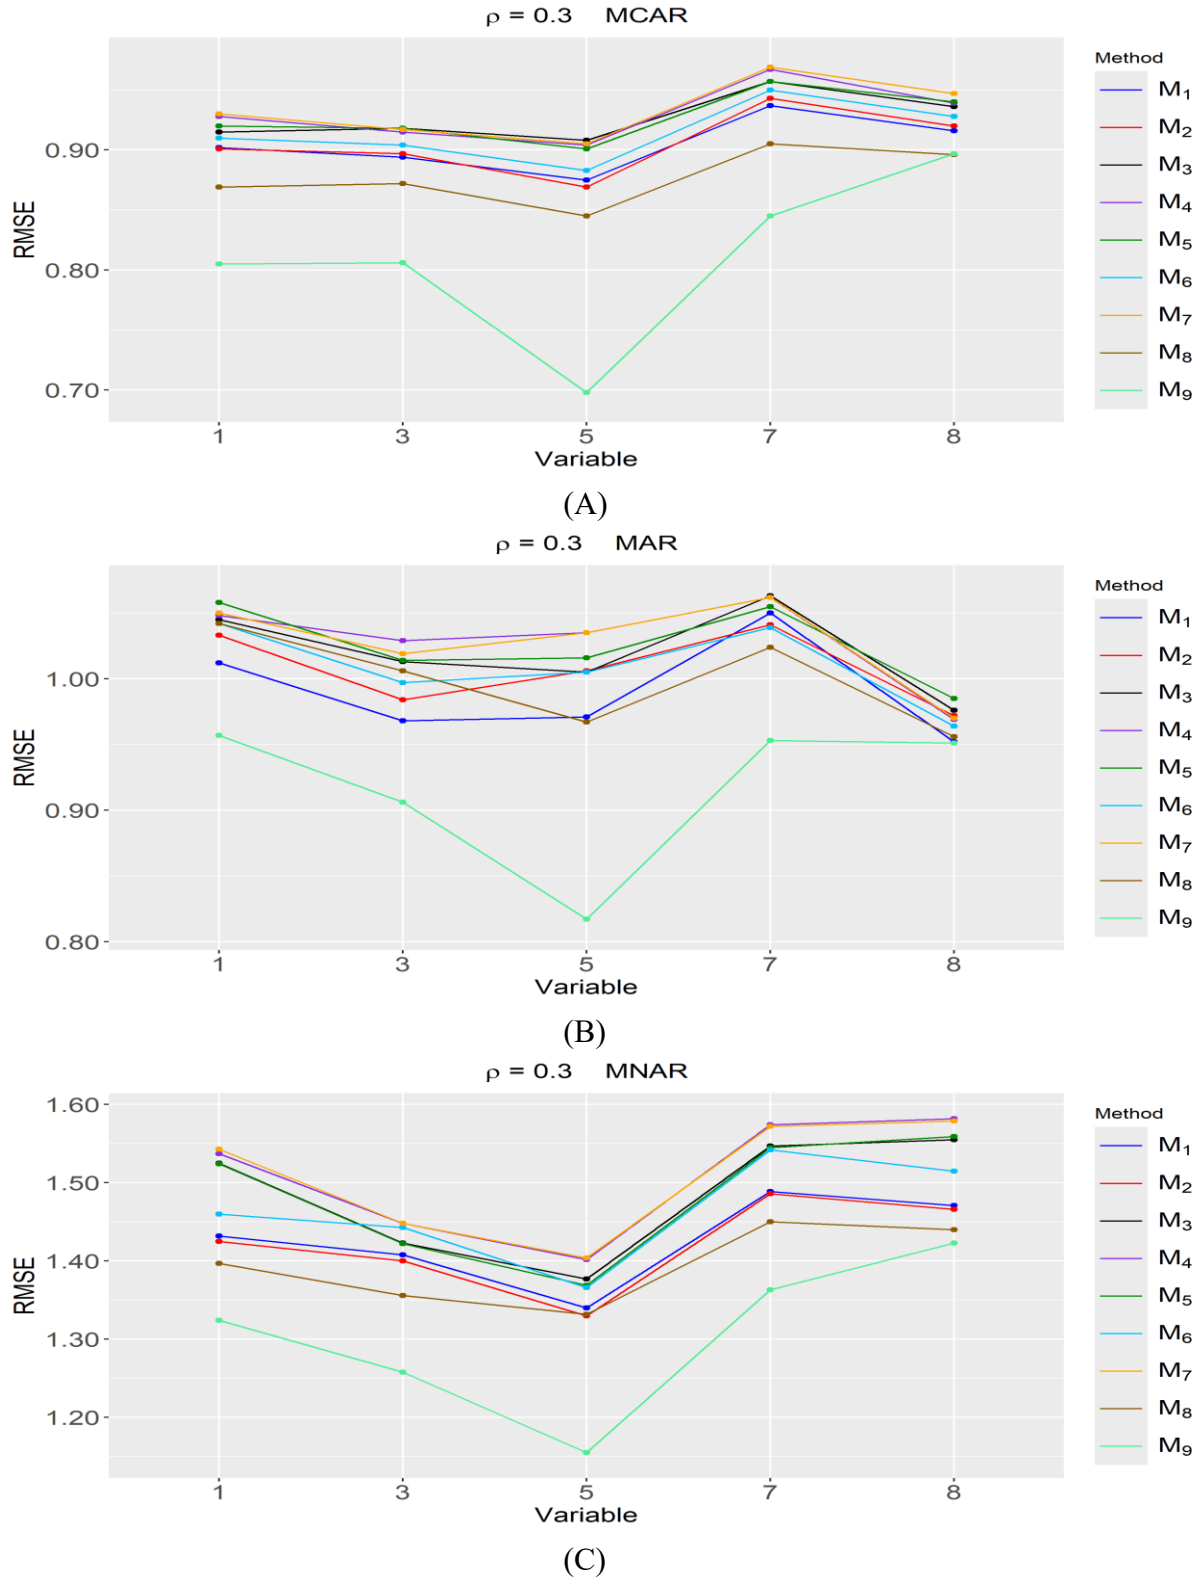

Figure S2: The imputation performances for quantitative variables 1, 3, 5, 7, and 8 under the condition  $\rho = 0.3$ , missing rate 20%,  $N = 500$ , and (A) MCAR, (B) MAR, (C) MNAR. The  $RMSE_p$  under Methods  $M_1$  to  $M_8$  are plotted respectively for each of the

variables. Imputation methods:  $M_1$ : *rpart* with surrogate variables;

$M_2$ : GI (RSS) + majority rule;  $M_3$ : GI (RSS) + RE algorithm;  $M_4$ : GI (RSS) + H-RE algorithm;  $M_5$ : CHI + majority rule;  $M_6$ : CHI + RE algorithm;  $M_7$ : CHI + H-RE algorithm;  $M_8$ : iterative imputation;  $M_9$ : *mice* with cart option.

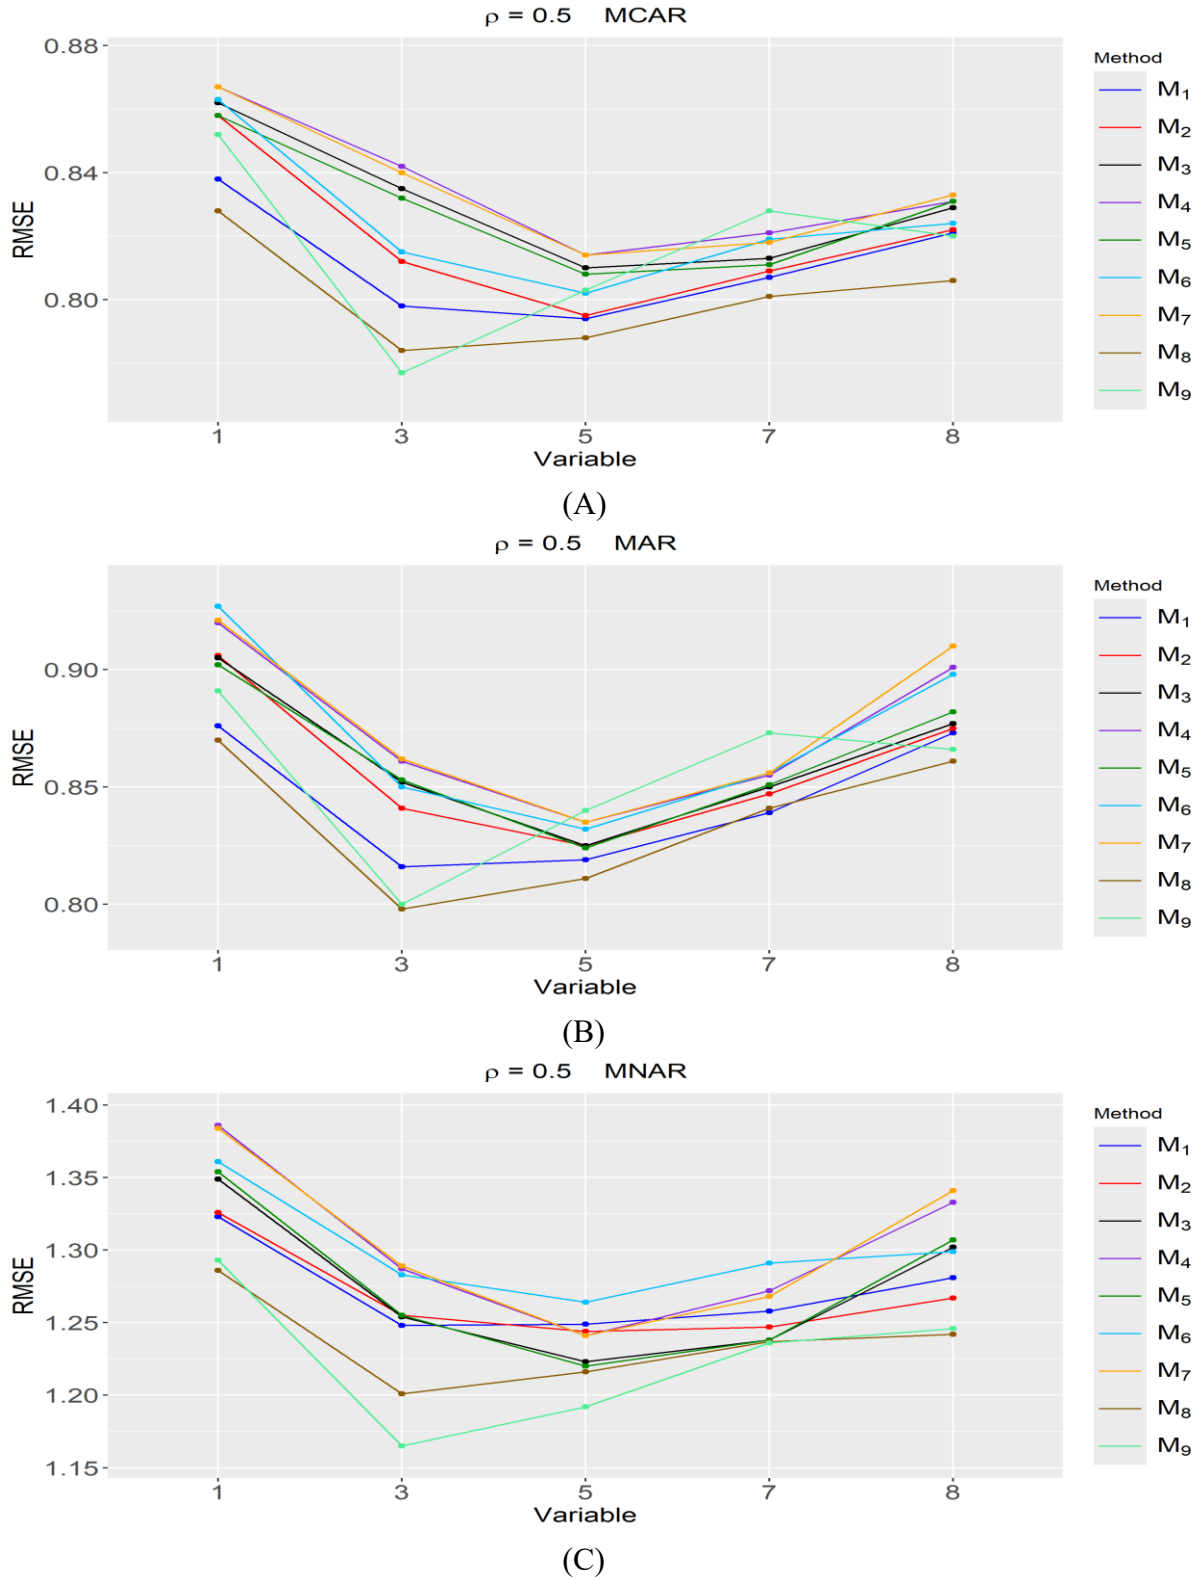

Figure S3: The imputation performances for quantitative variables 1, 3, 5, 7, and 8 under the condition  $\rho = 0.5$ , missing rate 20%,  $N = 500$ , and (A) MCAR, (B) MAR, (C) MNAR. The  $RMSE_p$  under Methods  $M_1$  to  $M_8$  are plotted respectively for each of the

variables. Imputation methods:  $M_1$ : *rpart* with surrogate variables;

$M_2$ : GI (RSS) + majority rule;  $M_3$ : GI (RSS) + RE algorithm;  $M_4$ : GI (RSS) + H-RE

algorithm;  $M_5$ : CHI + majority rule;  $M_6$ : CHI + RE algorithm;  $M_7$ : CHI + H-RE

algorithm;  $M_8$ : iterative imputation;  $M_9$ : *mice* with cart option.

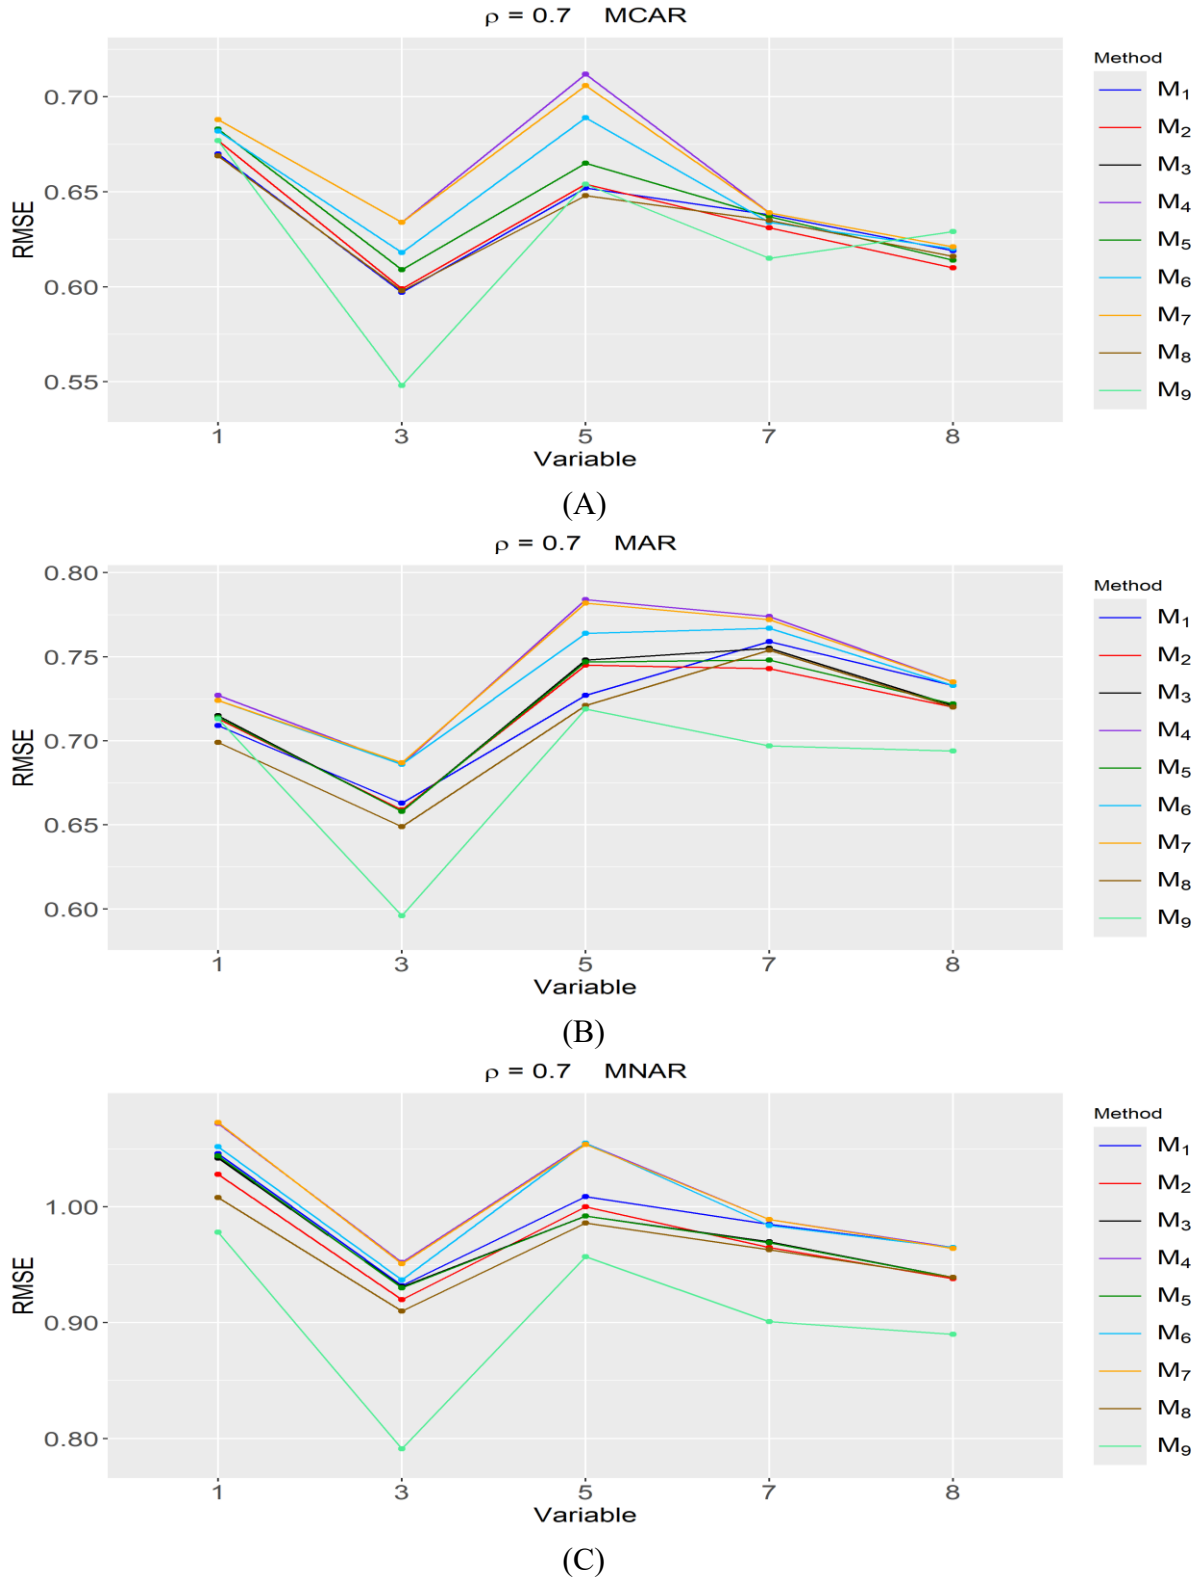

Figure S4: The imputation performances for quantitative variables 1, 3, 5, 7, and 8 under the condition  $\rho = 0.7$ , missing rate 20%,  $N = 500$ , and (A) MCAR, (B) MAR, (C) MNAR. The  $RMSE_p$  under Methods  $M_1$  to  $M_8$  are plotted respectively for each of the

variables. Imputation methods:  $M_1$ : *rpart* with surrogate variables;

$M_2$ : GI (RSS) + majority rule;  $M_3$ : GI (RSS) + RE algorithm;  $M_4$ : GI (RSS) + H-RE algorithm;  $M_5$ : CHI + majority rule;  $M_6$ : CHI + RE algorithm;  $M_7$ : CHI + H-RE algorithm;  $M_8$ : iterative imputation;  $M_9$ : *mice* with cart option.

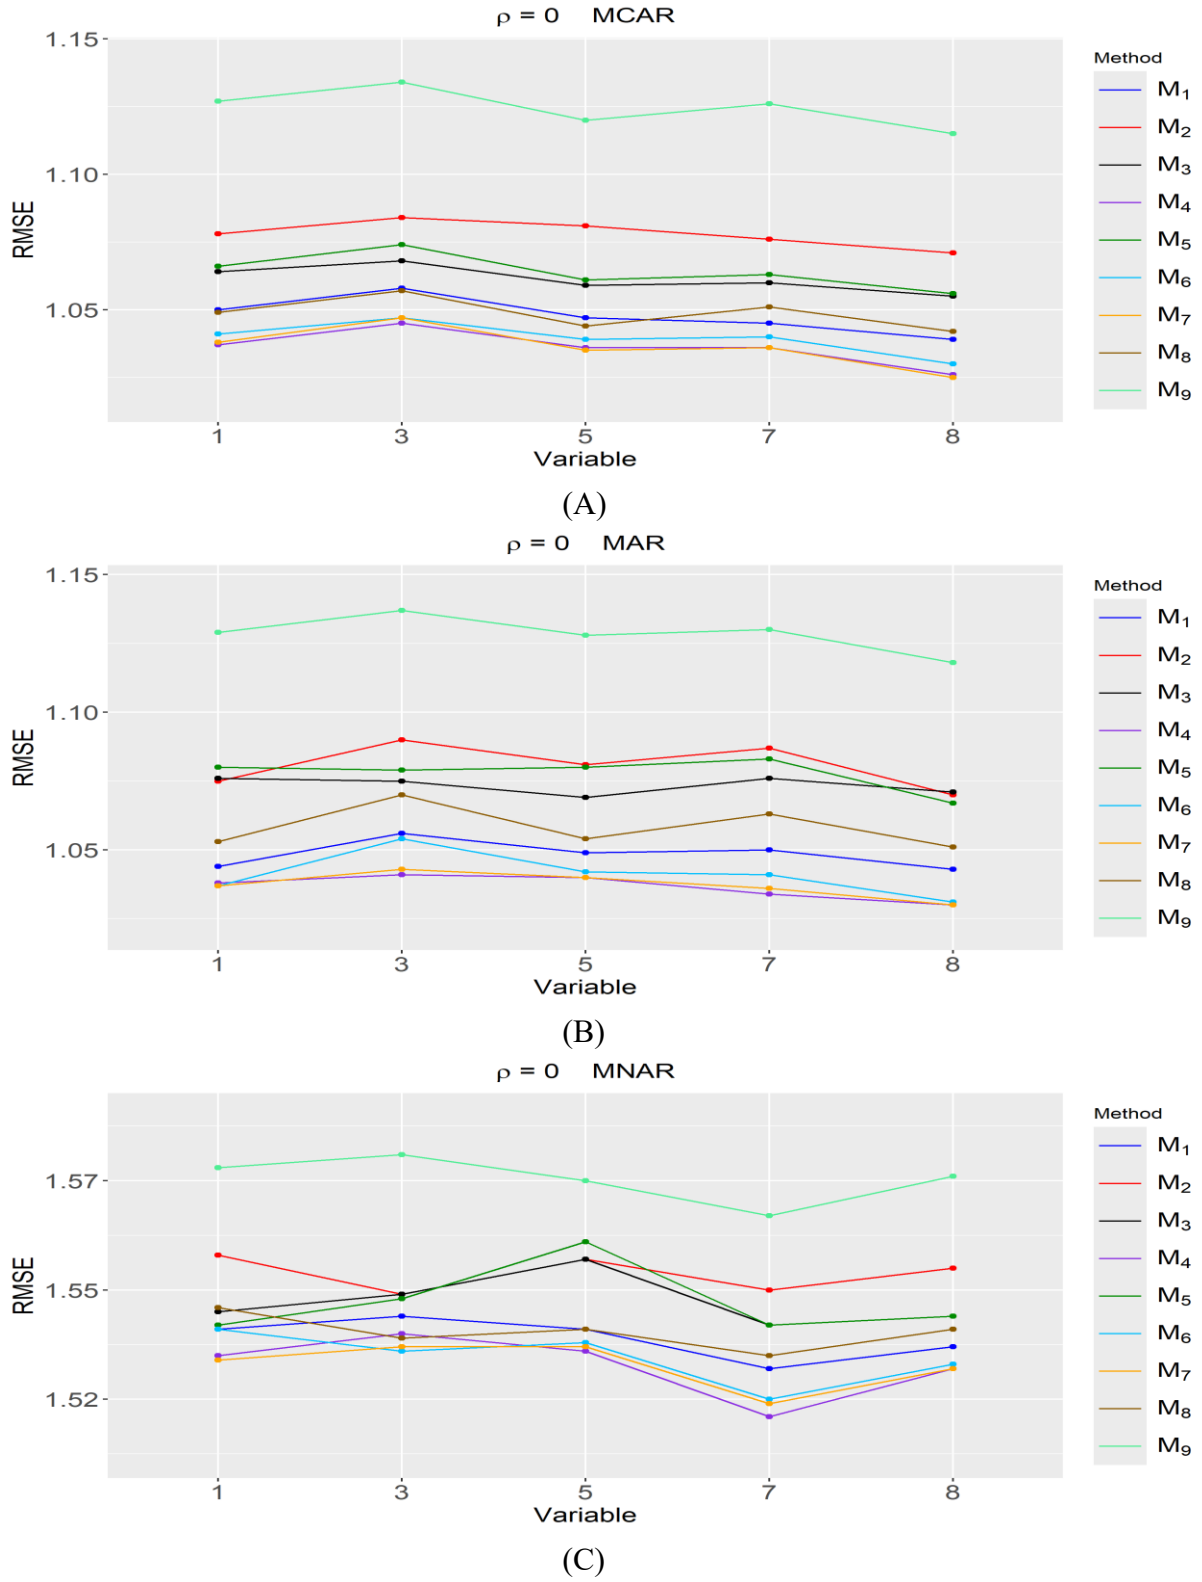

Figure S5: The imputation performances for quantitative variables 1, 3, 5, 7, and 8 under the condition  $\rho = 0$ , missing rate 30%,  $N = 500$ , and (A) MCAR, (B) MAR, (C) MNAR. The  $RMSE_p$  under Methods  $M_1$  to  $M_8$  are plotted respectively for each of the

variables. Imputation methods:  $M_1$ : *rpart* with surrogate variables;

$M_2$ : GI (RSS) + majority rule;  $M_3$ : GI (RSS) + RE algorithm;  $M_4$ : GI (RSS) + H-RE algorithm;  $M_5$ : CHI + majority rule;  $M_6$ : CHI + RE algorithm;  $M_7$ : CHI + H-RE algorithm;  $M_8$ : iterative imputation;  $M_9$ : *mice* with cart option.

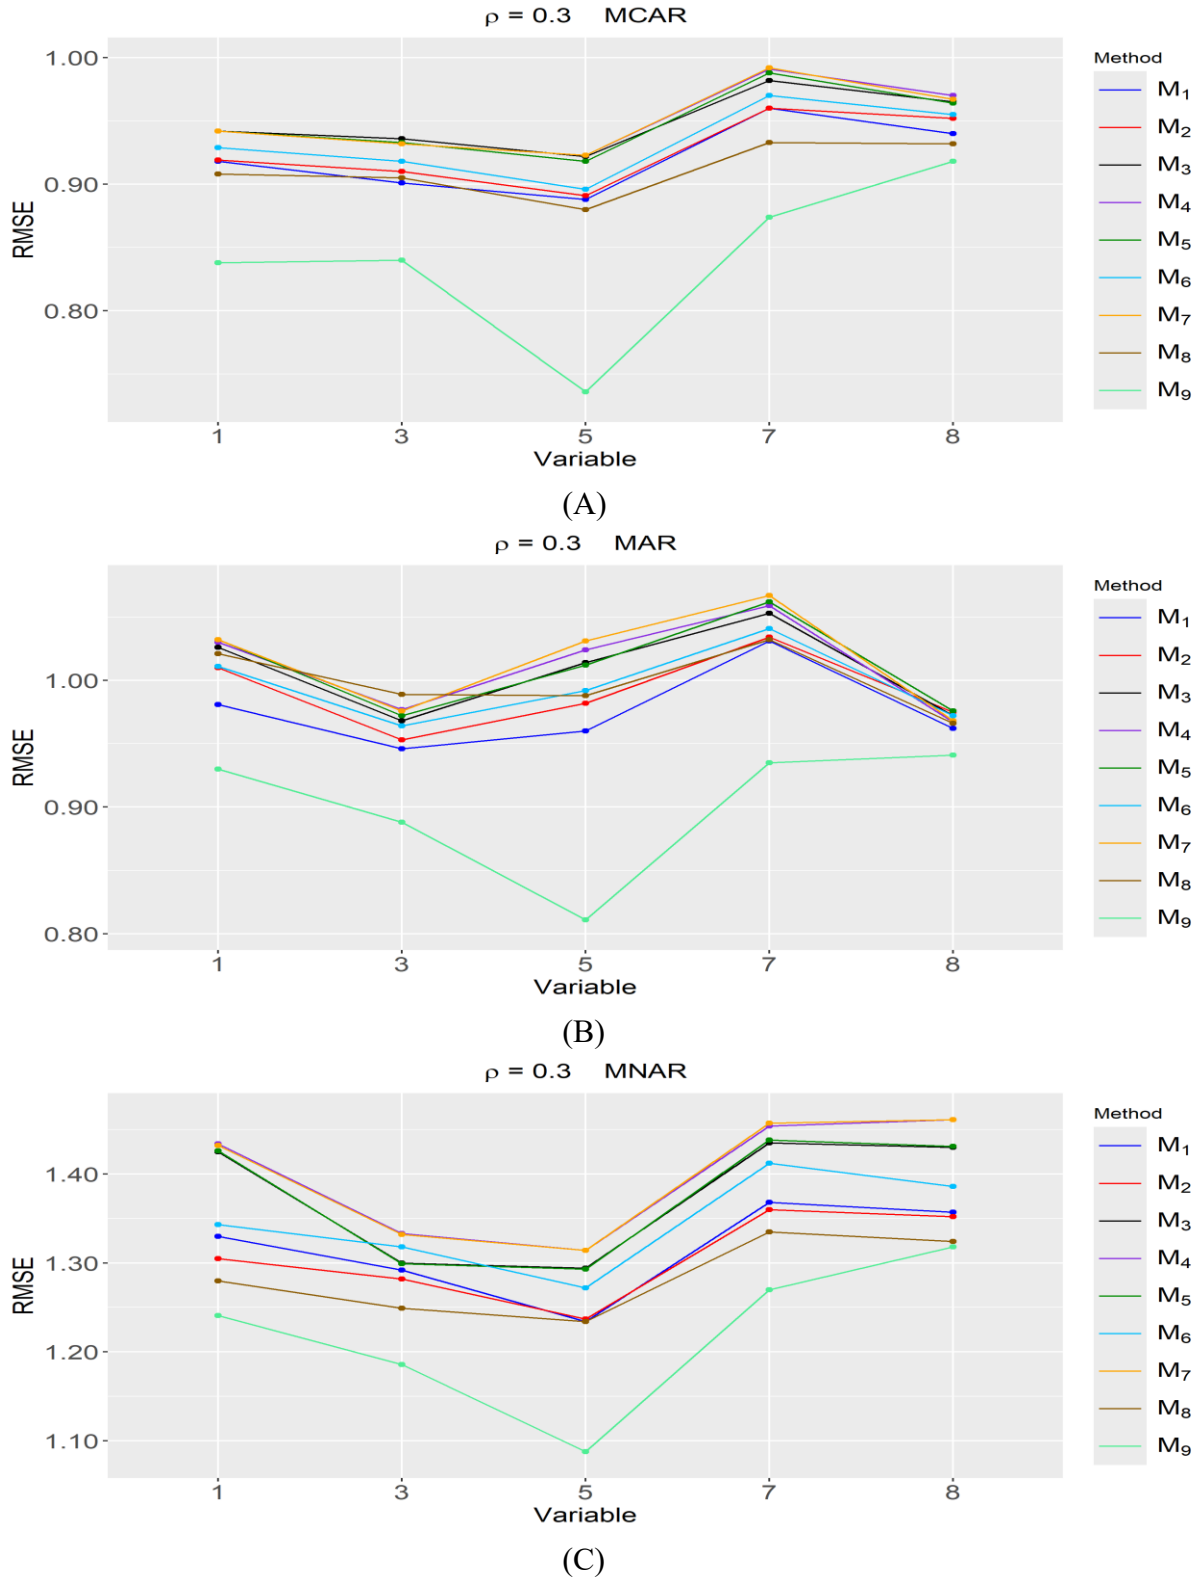

Figure S6: The imputation performances for quantitative variables 1, 3, 5, 7, and 8 under the condition  $\rho = 0.3$ , missing rate 30%,  $N = 500$ , and (A) MCAR, (B) MAR, (C) MNAR. The  $RMSE_p$  under Methods  $M_1$  to  $M_8$  are plotted respectively for each of the

variables. Imputation methods:  $M_1$ : *rpart* with surrogate variables;

$M_2$ : GI (RSS) + majority rule;  $M_3$ : GI (RSS) + RE algorithm;  $M_4$ : GI (RSS) + H-RE algorithm;  $M_5$ : CHI + majority rule;  $M_6$ : CHI + RE algorithm;  $M_7$ : CHI + H-RE algorithm;  $M_8$ : iterative imputation;  $M_9$ : *mice* with cart option.

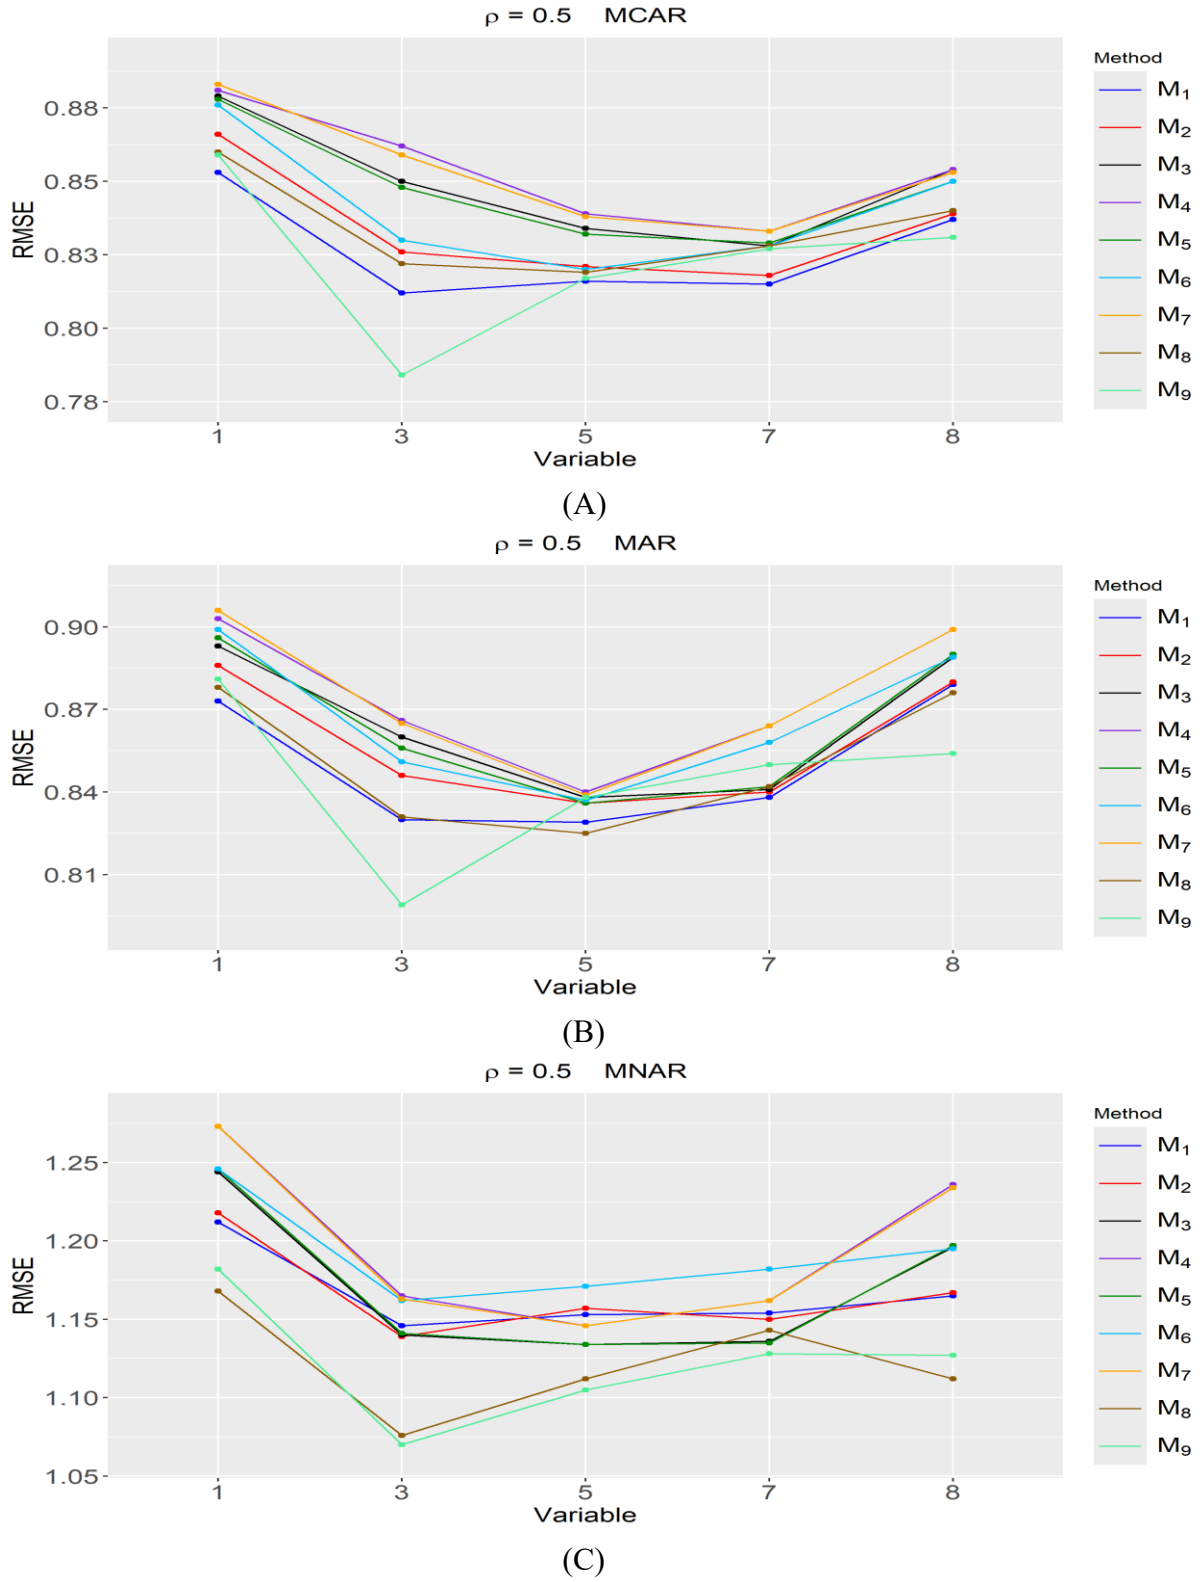

Figure S7: The imputation performances for quantitative variables 1, 3, 5, 7, and 8 under the condition  $\rho = 0.5$ , missing rate 30%,  $N = 500$ , and (A) MCAR, (B) MAR, (C) MNAR. The  $RMSE_p$  under Methods  $M_1$  to  $M_8$  are plotted respectively for each of the

variables. Imputation methods:  $M_1$ : *rpart* with surrogate variables;

$M_2$ : GI (RSS) + majority rule;  $M_3$ : GI (RSS) + RE algorithm;  $M_4$ : GI (RSS) + H-RE

algorithm;  $M_5$ : CHI + majority rule;  $M_6$ : CHI + RE algorithm;  $M_7$ : CHI + H-RE

algorithm;  $M_8$ : iterative imputation;  $M_9$ : *mice* with cart option.

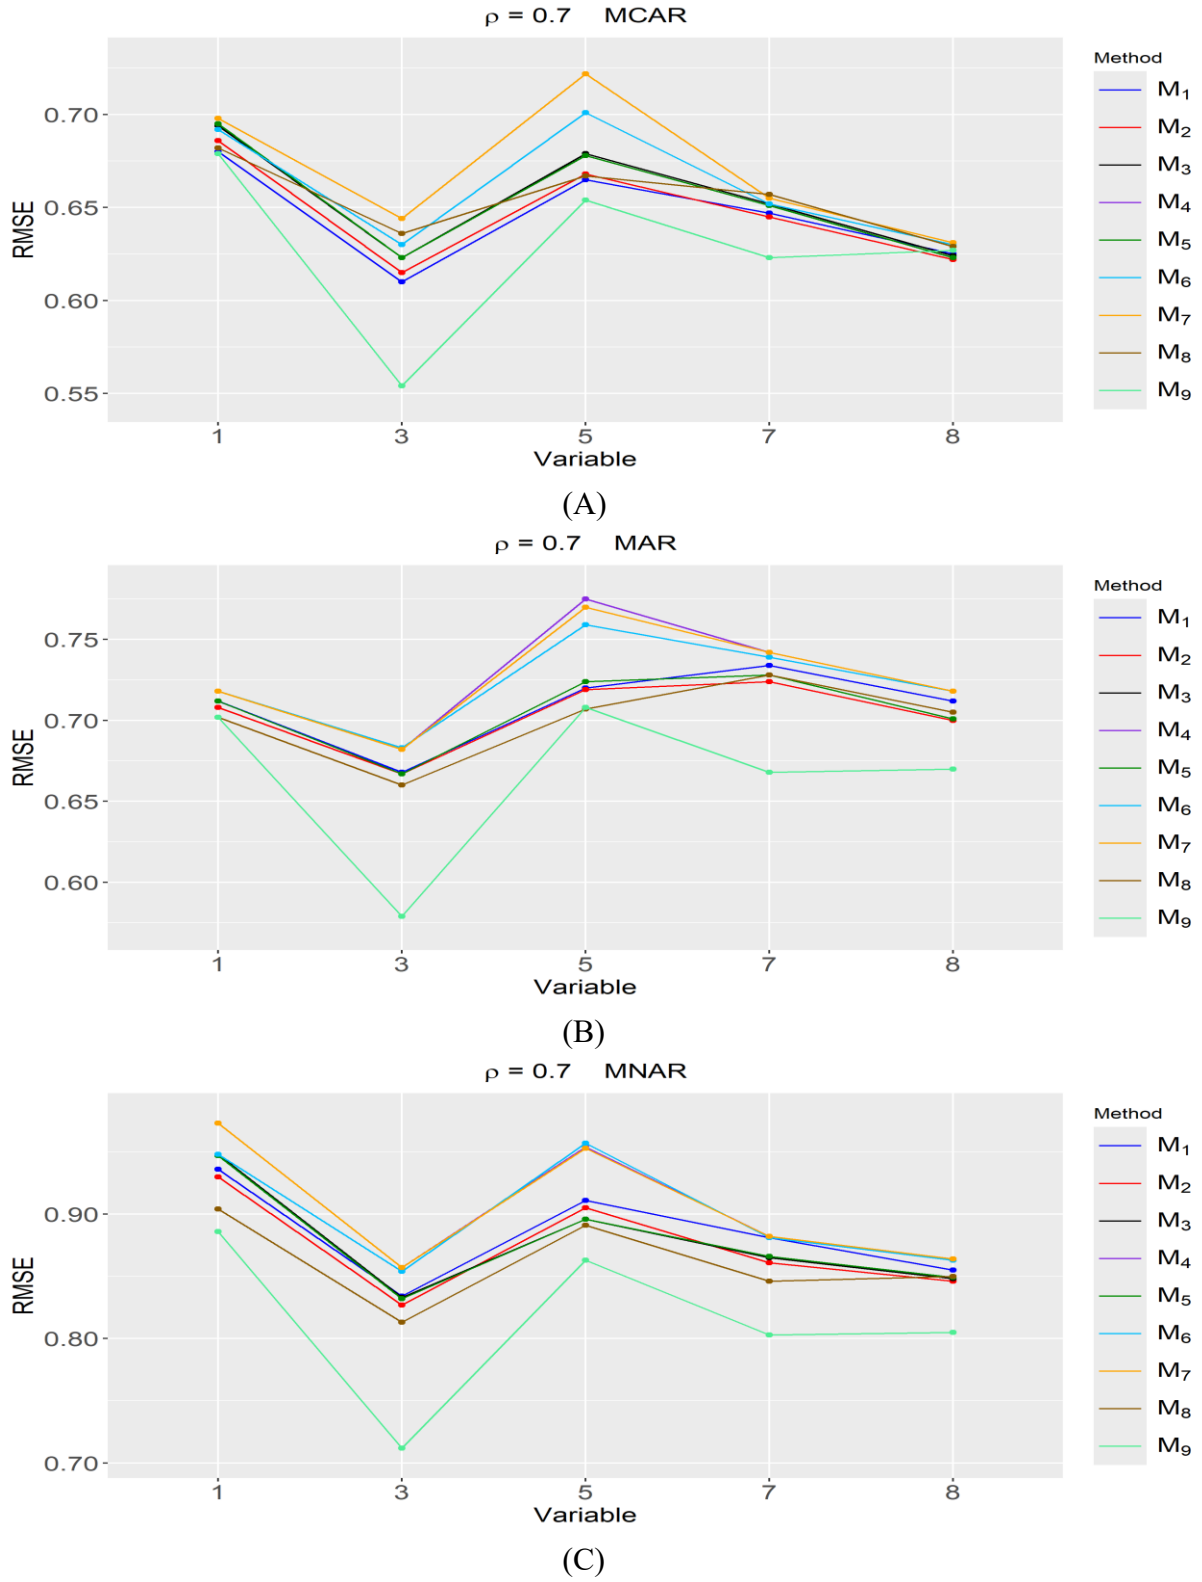

Figure S8: The imputation performances for quantitative variables 1, 3, 5, 7, and 8 under the condition  $\rho = 0.7$ , missing rate 30%,  $N = 500$ , and (A) MCAR, (B) MAR, (C) MNAR. The  $RMSE_p$  under Methods  $M_1$  to  $M_8$  are plotted respectively for each of the

variables. Imputation methods:  $M_1$ : *rpart* with surrogate variables;

$M_2$ : GI (RSS) + majority rule;  $M_3$ : GI (RSS) + RE algorithm;  $M_4$ : GI (RSS) + H-RE

algorithm;  $M_5$ : CHI + majority rule;  $M_6$ : CHI + RE algorithm;  $M_7$ : CHI + H-RE

algorithm;  $M_8$ : iterative imputation;  $M_9$ : *mice* with cart option.
